# Supplementary material
Source: PubMed Central journal article supplement (PMC6684050)

## **Appendix**

### **Group-Based Trajectory Models to Identify Sociodemographic and Clinical Predictors of Variable Statin Adherence Patterns among Older Adults**

Aisha Vadhariya, BPharm; Marc L. Fleming, PhD, MPH, RPh; Michael L. Johnson, PhD; E. James Essien, MD, DrPH; Omar Serna, PharmD, BCACP; Tara Esse, PharmD, BCACP; Jeannie Choi, PharmD; Susan H. Boklage, MS, MPH; Susan M. Abughosh, PhD

This Appendix has not been edited and is provided as supplemental materials for this article, which was published in *American Health & Drug Benefits* in June/July 2019.

## **SUPPLEMENTARY CONTENT**

**Figure: Adherence trajectory models with 1 to 5 groups. Proportion of patients with an adherent monthly proportion of days covered (PDC) have been plotted over a year**

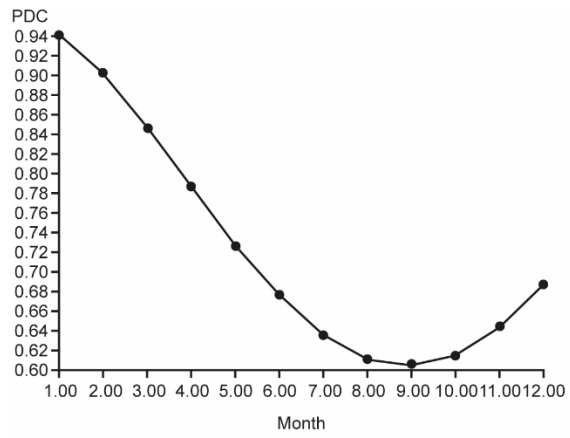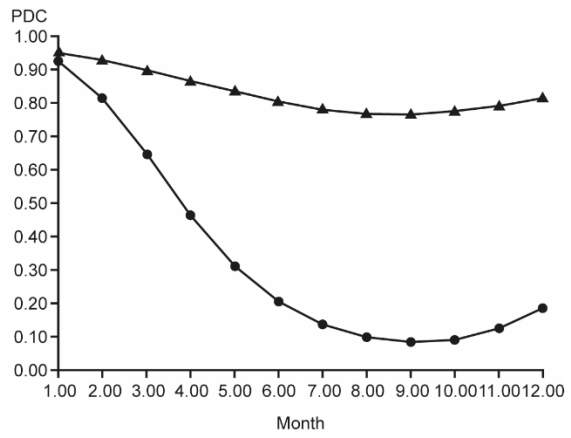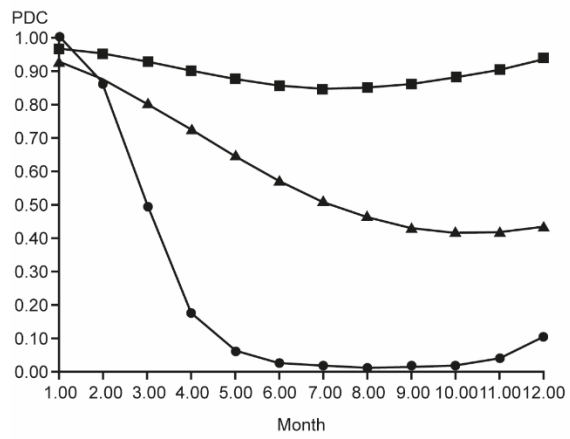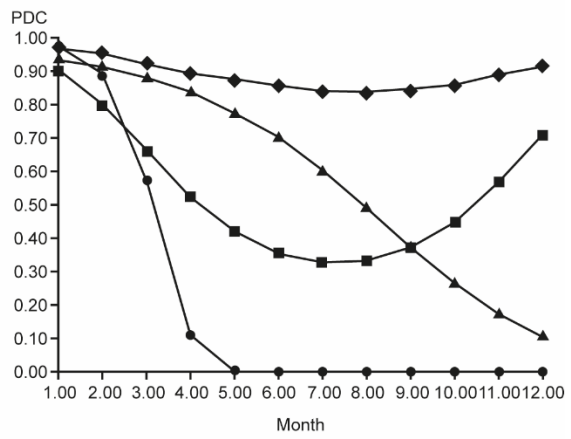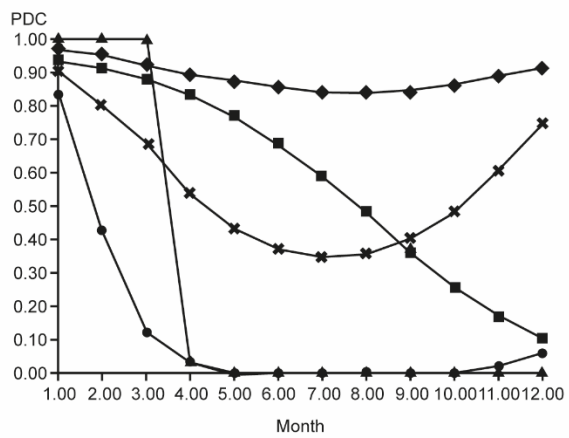

Supplement: ahdb-12-202-s2.pdf [file ahdb-12-202-s2.pdf]
